# Supplementary material for: Identifying Grapevine Rootstocks Tolerant to Copper Excess
Source: MDPI journal article supplement (doi:10.3390/horticulturae10080883), 2024-08-21
Supplement: s1 [file horticulturae-3106692-supplementary.pdf › horticulturae-3106692-supplementary.pdf]

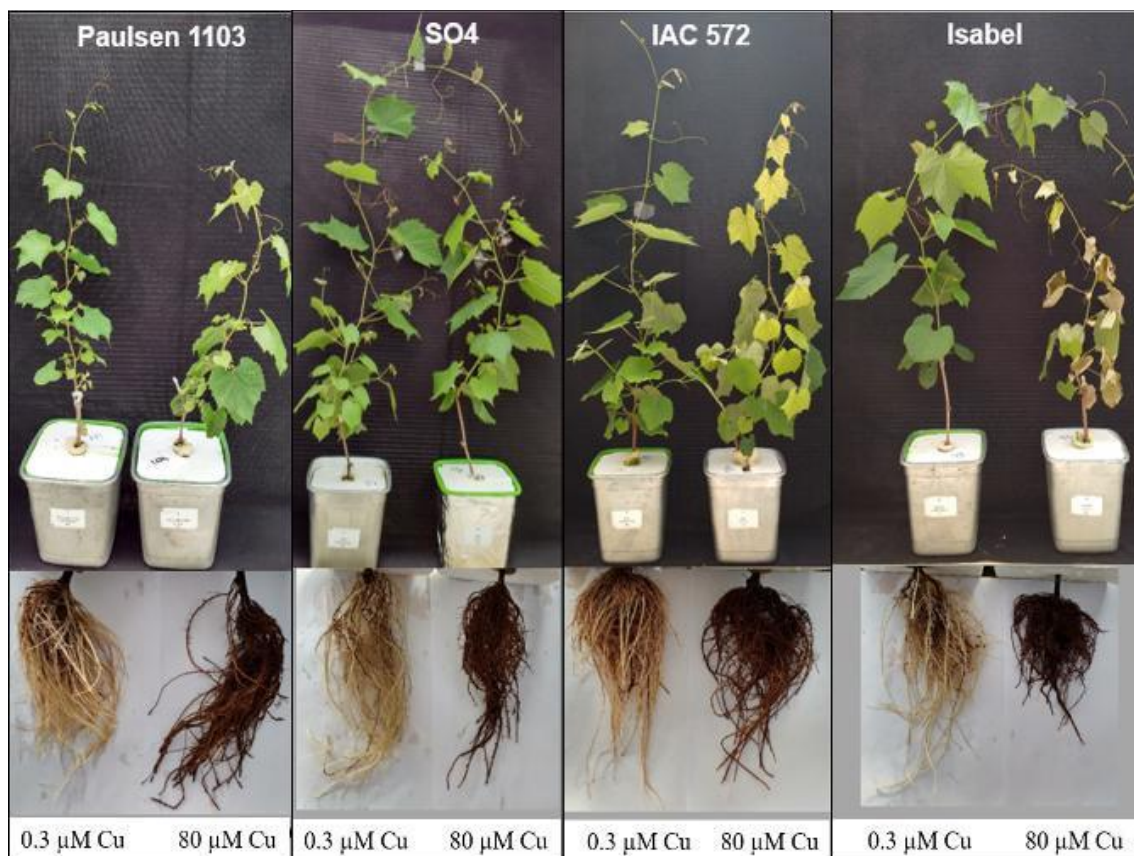

**Figure S1.** Grapevine rootstock images (Paulsen 1103, SO4, IAC 572 and Isabel) after 15 days of cultivation in the control (0.3  $\mu\text{M}$  Cu) or a high Cu (80  $\mu\text{M}$  Cu) nutrient solution.

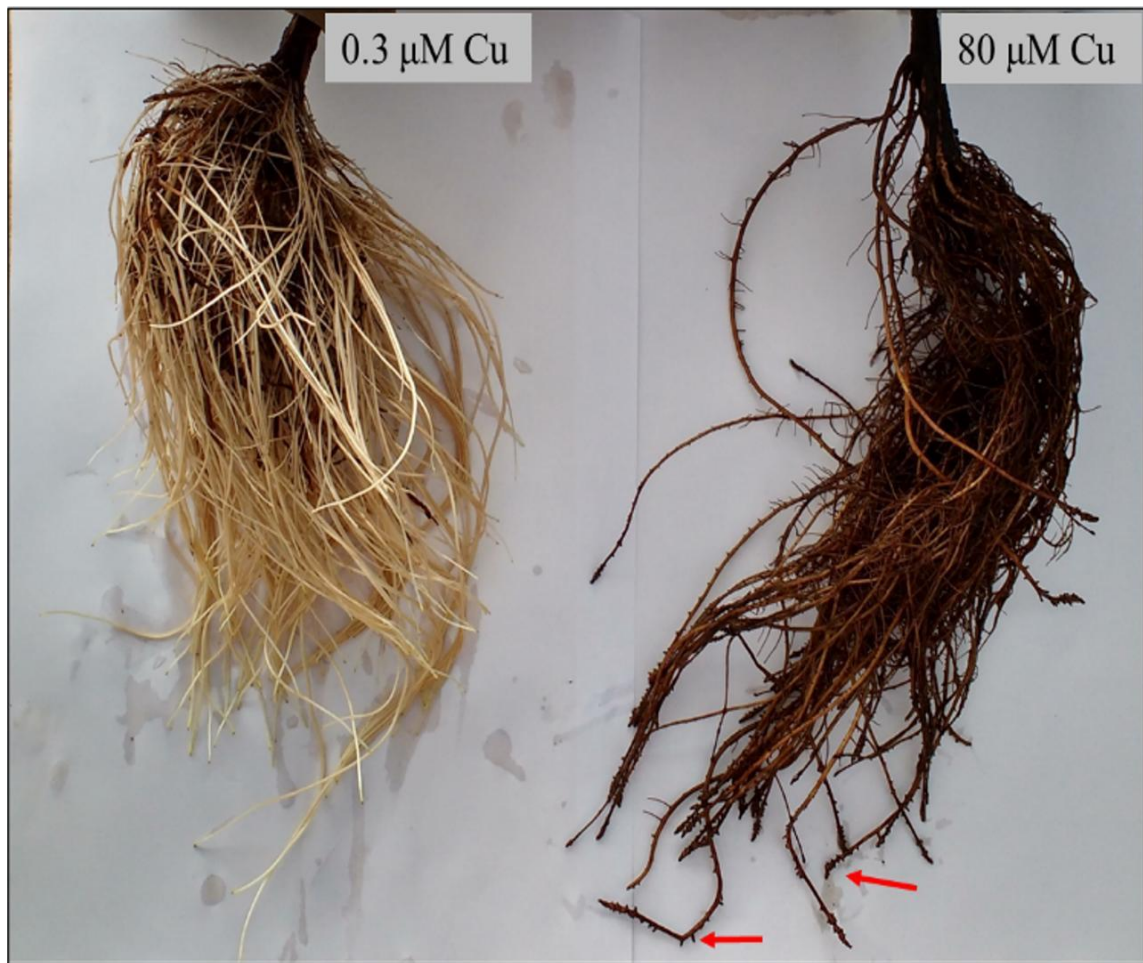

**Figure S2.** Root system image from rootstock Paulsen 1103 after 15 days of cultivation in the control (0.3  $\mu\text{M}$  Cu) or a high Cu (80  $\mu\text{M}$  Cu) nutrient solution.
